# Supplementary material for: Simulation of Appointment Scheduling Policies: a Study in a Bariatric Clinic
Source: Springer Nature journal article supplement (doi:10.1007/s11695-019-03898-1), 2019-04-29
Supplement: MOESM4 [file 16684780]

**Supplementary Material IV**

**Supplementary material.** Schedule of IICR rule proposed and implemented by the clinic.

| Morning schedule | |  | Afternoon schedule | |
| --- | --- | --- | --- | --- |
| Appointment time | Patient name |  | Appointment time | Patient name |
| 09:00 |  |  | 13:40 |  |
| 09:05 |  |  | 13:45 |  |
| 09:25 |  |  | 14:05 |  |
| 09:30 |  |  | 14:10 |  |
| 10:05 |  |  | 14:35 |  |
| 10:05 |  |  | 14:40 |  |
| 10:45 |  |  | 15:00 |  |
| 10:45 |  |  | 15:00 |  |
| 10:45 |  |  | 15:40 |  |
| 11:20 |  |  | 15:40 |  |
| 11:20 |  |  | 15:40 |  |
| 11:20 |  |  | 16:20 |  |
|  |  |  | 16:20 |  |
|  |  |  | 16:20 |  |
|  |  |  | 16:55 |  |
|  |  |  | 16:55 |  |
|  |  |  | 16:55 |  |
|  |  |  | 16:55 |  |
